# Supplementary material
Source: PubMed Central journal article supplement (PMC4315369)
Supplement: ChronicConditions.pdf [file ChronicConditions.pdf]

| Table 2. Description of patients in other chronic conditions in 2010-2011 |                        |                        |                        |                        |                        |                        |                        |                        |                        |                        |                        |                        |
|---------------------------------------------------------------------------|------------------------|------------------------|------------------------|------------------------|------------------------|------------------------|------------------------|------------------------|------------------------|------------------------|------------------------|------------------------|
| Variable                                                                  | COPD                   |                        | Hypertension           |                        | Angina                 |                        | Chronic Kidney Disease |                        | Osteoarthritis         |                        | Stroke                 |                        |
|                                                                           | RUB 4                  | RUB 5                  |
| Number from demographic description                                       | 23,421                 | 16,603                 | 64,522                 | 27,839                 | 27,775                 | 18,268                 | 16,784                 | 13,936                 | 59,108                 | 31,380                 | 14,806                 | 14,507                 |
| Number used in GLM analyses                                               | 23,360                 | 16,528                 | 64,350                 | 27,752                 | 27,703                 | 18,199                 | 16,729                 | 13,862                 | 58,919                 | 31,251                 | 14,767                 | 14,472                 |
| <b>Demographic and predictor variables</b>                                |                        |                        |                        |                        |                        |                        |                        |                        |                        |                        |                        |                        |
| Age, years, mean (SD)                                                     | 72.0 (11.0)            | 73.3 (11.2)            | 67.4 (14.5)            | 71.1 (13.1)            | 72.9 (11.3)            | 74.4 (11.1)            | 70.2 (15.6)            | 72.5 (13.7)            | 69.5 (13.7)            | 73.1 (12.6)            | 73.9 (12.3)            | 75.4 (11.7)            |
| Median (range <sup>a</sup> )                                              | 73 (45-105)            | 75 (45-104)            | 69 (20-105)            | 73 (22-105)            | 74 (22-106)            | 76 (29-105)            | 74 (18-105)            | 75 (18-104)            | 71 (18-105)            | 75 (19-105)            | 76 (20-104)            | 78 (20-103)            |
| Number (%) excluded                                                       | 0 (0)                  | 0 (0)                  | 0 (0)                  | 0 (0)                  | 0 (0)                  | 0 (0)                  | 160 (0.80)             | 43 (0.21)              | 50 (0.07)              | 4 (< 0.01)             | 0 (0)                  | 0 (0)                  |
| Male sex, %                                                               | 49.9                   | 54.4                   | 43.5                   | 50.2                   | 59.6                   | 62.3                   | 48.0                   | 53.2                   | 39.8                   | 46.5                   | 50.8                   | 54.5                   |
| Type of community, <sup>b</sup> %                                         |                        |                        |                        |                        |                        |                        |                        |                        |                        |                        |                        |                        |
| Metropolitan                                                              | 32.3                   | 31.8                   | 39.5                   | 38.1                   | 35.0                   | 35.6                   | 40.0                   | 39.0                   | 35.9                   | 35.0                   | 38.4                   | 37.9                   |
| Urban                                                                     | 46.3                   | 46.5                   | 43.4                   | 44.0                   | 46.7                   | 46.6                   | 43.8                   | 43.7                   | 45.7                   | 46.2                   | 44.5                   | 45.2                   |
| Town                                                                      | 14.5                   | 14.8                   | 11.8                   | 12.2                   | 12.0                   | 11.9                   | 10.9                   | 11.9                   | 12.3                   | 12.7                   | 11.7                   | 11.5                   |
| Village                                                                   | 6.9                    | 7.0                    | 5.3                    | 5.6                    | 6.3                    | 5.9                    | 5.3                    | 5.3                    | 6.0                    | 6.1                    | 5.4                    | 5.4                    |
| Median income, mean (SD)                                                  | 46,484 (8875)          | 46,323 (9037)          | 47,879 (9349)          | 47,628 (9578)          | 47,574 (9057)          | 47,443 (9182)          | 47,365 (9274)          | 47,160 (9323)          | 47,574 (9185)          | 47,248 (9308)          | 47,612 (9166)          | 47,476 (9396)          |
| Median income, median (range)                                             | 45,504 (15,543-89,621) | 45,340 (15,543-89,621) | 46,472 (15,543-89,621) | 46,472 (15,543-89,621) | 46,472 (15,543-89,621) | 46,472 (15,543-89,621) | 46,472 (15,543-89,621) | 46,472 (15,543-89,621) | 46,472 (15,543-89,621) | 45,987 (15,543-89,621) | 46,472 (15,543-89,621) | 46,472 (15,543-89,621) |
| Attachment, %, mean (SD)                                                  | 79.0 (19.1)            | 72.0 (20.0)            | 78.1 (19.8)            | 73.4 (20.2)            | 80.0 (18.9)            | 72.9 (20.2)            | 80.4 (19.2)            | 72.4 (20.3)            | 78.0 (19.6)            | 72.8 (20.2)            | 80.3 (18.7)            | 73.0 (20.0)            |
| Attachment, median (range)                                                | 83.3 (15-100)          | 74.2 (10.9-100)        | 82.6 (12.5-100)        | 76.5 (8.0,100)         | 85.0 (15.2-100)        | 75 (10.9-100)          | 85.7 (10.5-100)        | 75 (14.3-100)          | 82.3 (13.8-100)        | 75 (10.9-100)          | 85.3 (14.3-100)        | 75 (11.5-100)          |
| <b>Cost variables (in Can\$1000)</b>                                      |                        |                        |                        |                        |                        |                        |                        |                        |                        |                        |                        |                        |
| Medical Services Program                                                  |                        |                        |                        |                        |                        |                        |                        |                        |                        |                        |                        |                        |
| Mean (SD)                                                                 | 2228 (1521)            | 3968 (2765)            | 1989 (1460)            | 3408 (2567)            | 2365 (1654)            | 4260 (3130)            | 2602 (1995)            | 4994 (3746)            | 2184 (1484)            | 3733 (2605)            | 2161 (1495)            | 3835 (2810)            |
| Median (range)                                                            | 1864 (170-26,654)      | 3261 (238-27,560)      | 1612 (126-27,714)      | 2701 (1858-32,341)     | 1964 (163-22,835)      | 3362 (236-34,723)      | 2091 (148-26,654)      | 3887 (272-34,723)      | 1830 (132-26,654)      | 3082 (185-29,746)      | 1796 (180-18,605)      | 3070 (218-30,017)      |
| Pharmacy costs, mean (SD)                                                 | 1558 (2890)            | 2111 (3237)            | 774 (2146)             | 1135 (2520)            | 1346 (2274)            | 1770 (2652)            | 1512 (2822)            | 2012 (3266)            | 1162 (2671)            | 1660 (2992)            | 1266 (2247)            | 1586 (2641)            |
| Median (range)                                                            | 715 (0-99,643)         | 1154 (0-92,798)        | 79 (0-95,578)          | 344 (0-92,798)         | 658 (0-74,776)         | 970 (0-57,117)         | 665 (0-62,393)         | 1064 (0-92,798)        | 288 (0-99,643)         | 677 (0-57,848)         | 583 (0-77,725)         | 788 (0-58,190)         |
| Number (%) excluded                                                       | 2 (< 0.01)             | 3 (0.01)               | 2 (0.01)               | 2 (< 0.01)             | 1 (< 0.01)             | 1 (< 0.01)             | 1 (< 0.01)             | 1 (< 0.01)             | 0 (0)                  | 0 (0)                  | 0 (0)                  | 3 (0.01)               |
| Hospital costs, mean (SD)                                                 | 3119 (6992)            | 12,194 (16,910)        | 2431 (5757)            | 8761 (13,971)          | 3182 (6604)            | 11,729 (16,404)        | 3012 (6696)            | 14,913 (19,237)        | 2662 (6094)            | 10004 (15038)          | 3165 (7585)            | 12,603 (18,073)        |
| Median (range <sup>a,b</sup> )                                            | 0 (0-98,533)           | 5934 (0-99,921)        | 0 (0-97,708)           | 3377 (0-99,968)        | 0 (0-99,363)           | 5937 (0-99,968)        | 0 (0-98,878)           | 7722 (0-99,885)        | 0 (0-99,363)           | 4368 (0-99,968)        | 0 (0-97,194)           | 5619 (0-99,968)        |
| Number (%) excluded                                                       | 17 (0.06)              | 296 (1.30)             | 29 (0.04)              | 261 (0.76)             | 7 (0.02)               | 225 (0.96)             | 12 (0.06)              | 461 (2.25)             | 26 (0.04)              | 379 (0.93)             | 18 (0.10)              | 351 (1.65)             |
| Total costs, mean (SD)                                                    | 6906 (8645)            | 18,271 (19,403)        | 5194 (7134)            | 13,304 (16,130)        | 6892 (8143)            | 17,758 (18,841)        | 7126 (8834)            | 21,918 (22,352)        | 6008 (7668)            | 15,396 (17,363)        | 6592 (8792)            | 18023 (20,315)         |
| Median (range)                                                            | 4095 (170-122,922)     | 11,628 (289-136,403)   | 2729 (141-122,922)     | 7468 (218-126,633)     | 4101 (163-107,806)     | 11,387 (253-126,633)   | 4185 (148-132,181)     | 14,163 (272-136,403)   | 3392 (132-132,181)     | 9483 (258-140,808)     | 3744 (180-112,196)     | 10,416 (218-136,403)   |
| <b>Other filter variables</b>                                             |                        |                        |                        |                        |                        |                        |                        |                        |                        |                        |                        |                        |
| GP services, mean (SD)                                                    | 19.6 (13.8)            | 31.1 (21.2)            | 16.3 (11.3)            | 23.9 (17.1)            | 18.0 (12.4)            | 28.7 (20.2)            | 18.1 (13.2)            | 30.3 (22.0)            | 18.5 (12.6)            | 28.3 (19.5)            | 18.4 (12.5)            | 29.9 (20.4)            |
| Median (range <sup>c</sup> )                                              | 16 (5-238)             | 25 (5-216)             | 13 (5-226)             | 19 (5-296)             | 14 (5-156)             | 23 (5-194)             | 14 (5-228)             | 24 (5-471)             | 15 (5-228)             | 23 (5-219)             | 15 (5-226)             | 24 (5-187)             |
| Number (%) excluded                                                       | 871 (3.21)             | 280 (1.23)             | 3563 (4.93)            | 676 (1.96)             | 1290 (4.09)            | 294 (1.25)             | 1151 (5.72)            | 528 (2.58)             | 2494 (3.73)            | 507 (1.25)             | 701 (3.74)             | 276 (1.30)             |
| Number of payees, mean (SD)                                               | 2.92 (1.89)            | 4.27 (2.76)            | 2.80 (1.78)            | 3.71 (2.42)            | 2.78 (1.79)            | 4.03 (2.63)            | 2.74 (1.90)            | 4.16 (2.78)            | 2.94 (1.89)            | 4.04 (2.64)            | 2.80 (1.82)            | 4.10 (2.64)            |
| Median (range <sup>d</sup> )                                              | 2 (1-22)               | 4 (1-25)               | 2 (1-24)               | 3 (1-25)               | 2 (1-22)               | 3 (1-25)               | 2 (1-25)               | 4 (1-25)               | 3 (1-23)               | 3 (1-25)               | 2 (1-19)               | 3 (1-25)               |

<sup>a</sup> Minimum age was set by inclusion criterion at 18 years.

<sup>b</sup> See reference 12 for definitions of the categories of communities in British Columbia.

<sup>c</sup> Maximum hospital cost was set by inclusion criterion to Can\$100,000.

<sup>d</sup> Minimum value was set by inclusion criterion to 5 GP services.

<sup>e</sup> Maximum value was set by inclusion criterion to 25 payee numbers.

Can\$ = Canadian dollars; COPD = chronic obstructive pulmonary disease; GLM = general linear model; GP = general practitioner; NS = not significant ( $p > 0.05$ ); RUB = resource utilization band; SD = standard deviation.
