# Supplementary material
Source: PubMed Central journal article supplement (PMC4315369)
Supplement: CostRatioEstimates.pdf [file CostRatioEstimates.pdf]

**A. Diabetes**

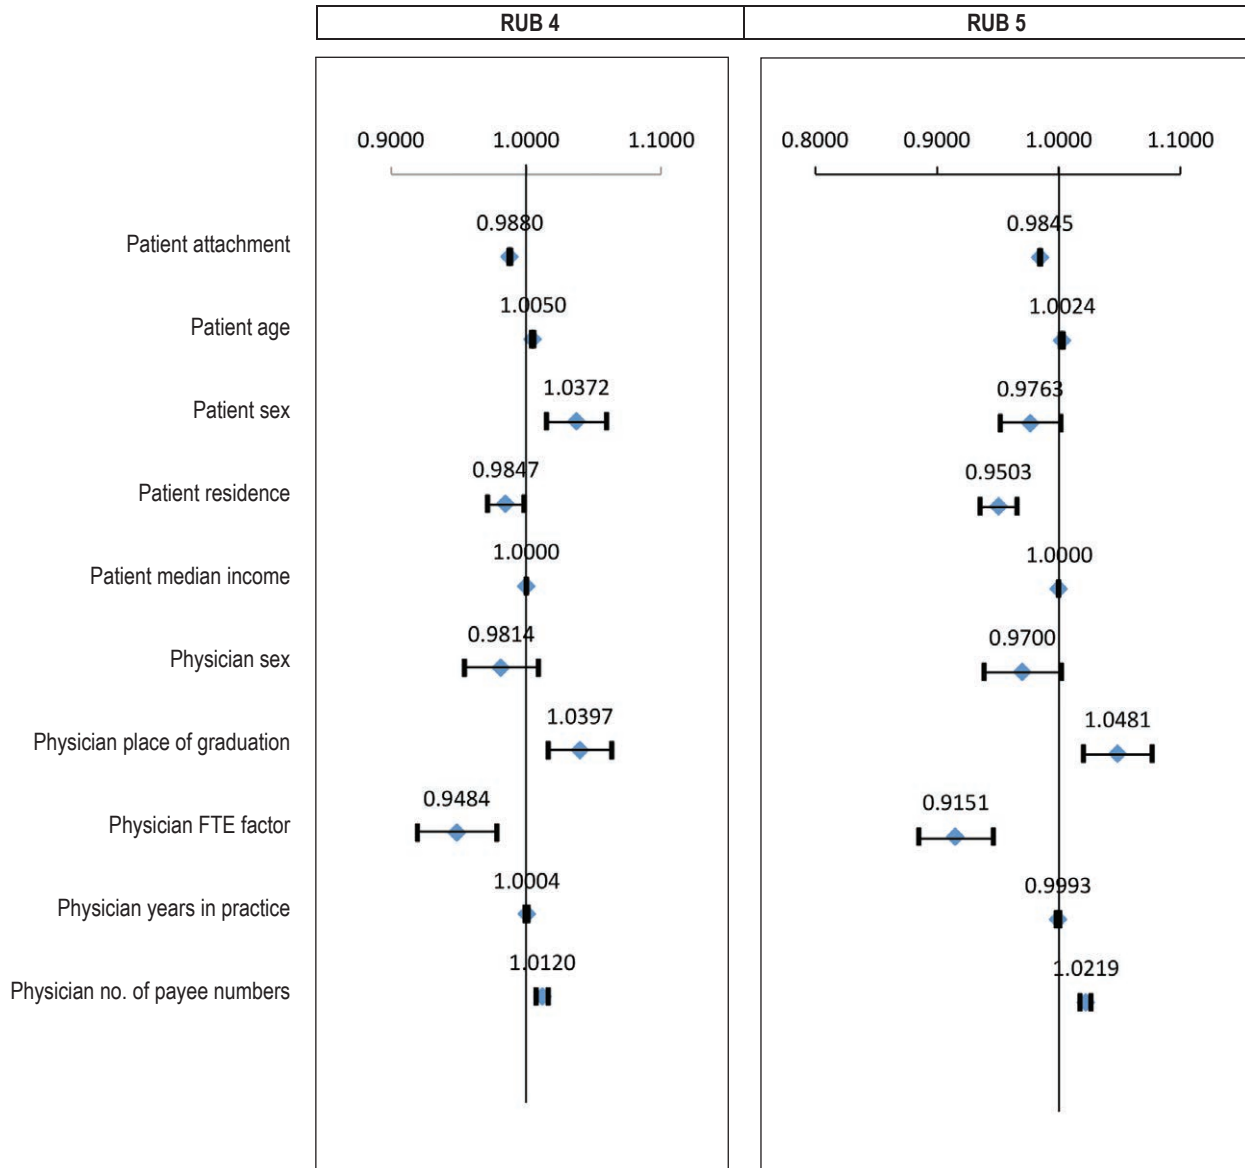

Figure 1A-H. Cost ratio estimates (with 95% confidence intervals) for predictors of total health care costs for 8 chronic conditions in fiscal year 2010-2011.<sup>a</sup>

<sup>a</sup> Cost ratios (Exp[B]) were estimated using generalized linear models with the log link function and  $\gamma$ -distributed errors and all predictors entered simultaneously. Error bars indicate 95% confidence intervals.

FTE = full-time equivalent; RUB = Resource Utilization Band.

**B. CHF**

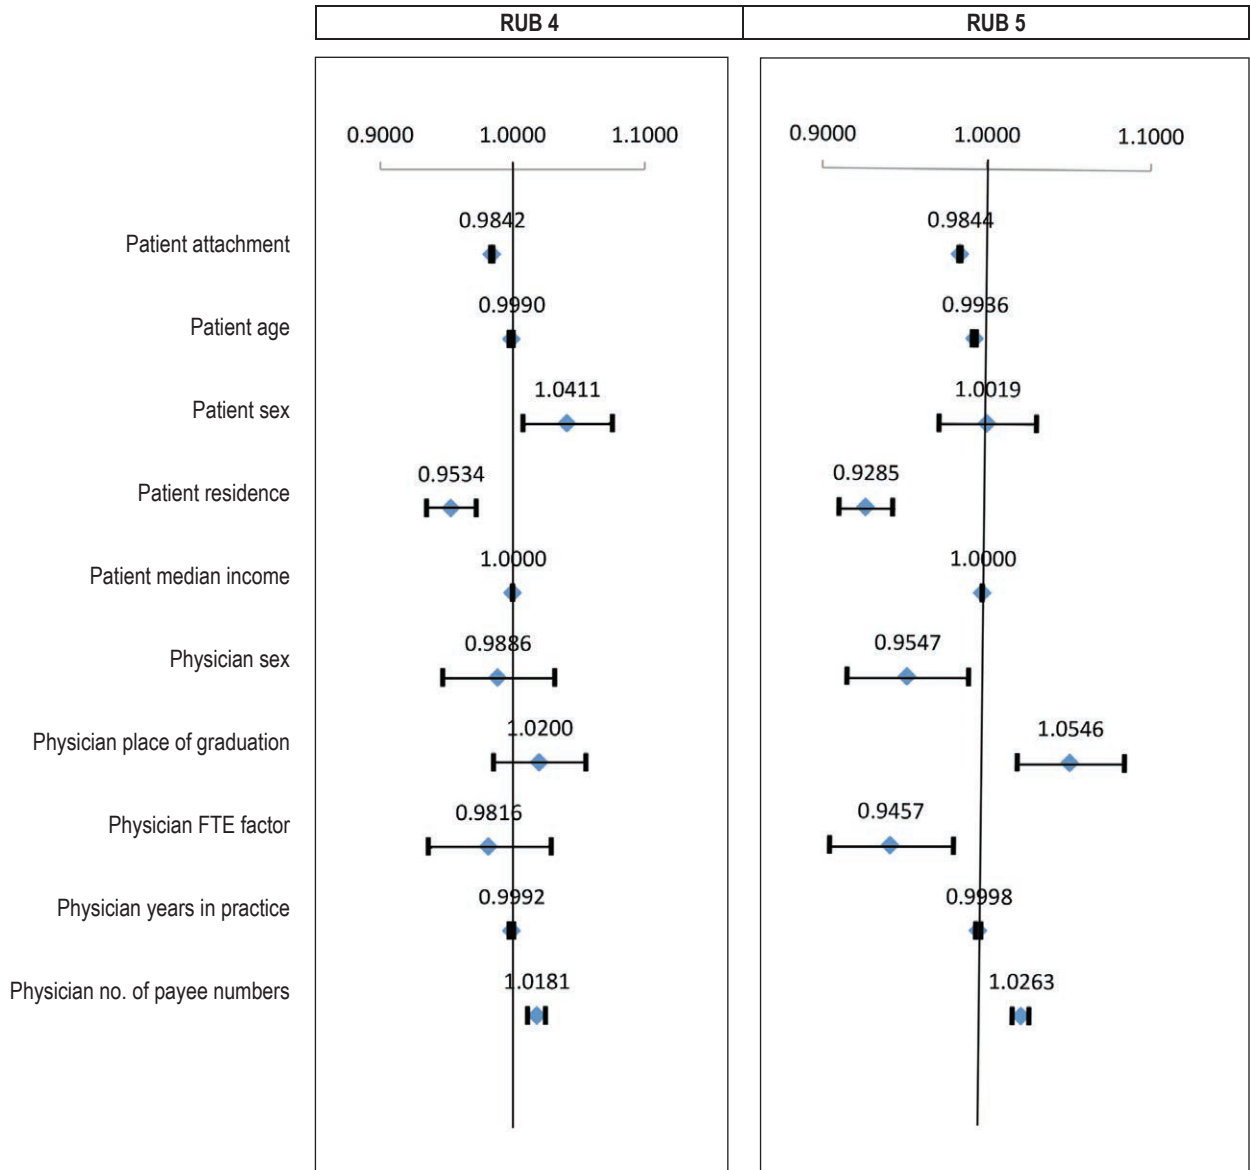

Figure 1A-H. Cost ratio estimates (with 95% confidence intervals) for predictors of total health care costs for 8 chronic conditions in fiscal year 2010-2011.<sup>a</sup>

<sup>a</sup> Cost ratios (Exp[B]) were estimated using generalized linear models with the log link function and  $\gamma$ -distributed errors and all predictors entered simultaneously. Error bars indicate 95% confidence intervals.

CHF = congestive heart failure; FTE = full-time equivalent; RUB = resource utilization band.

C. COPD

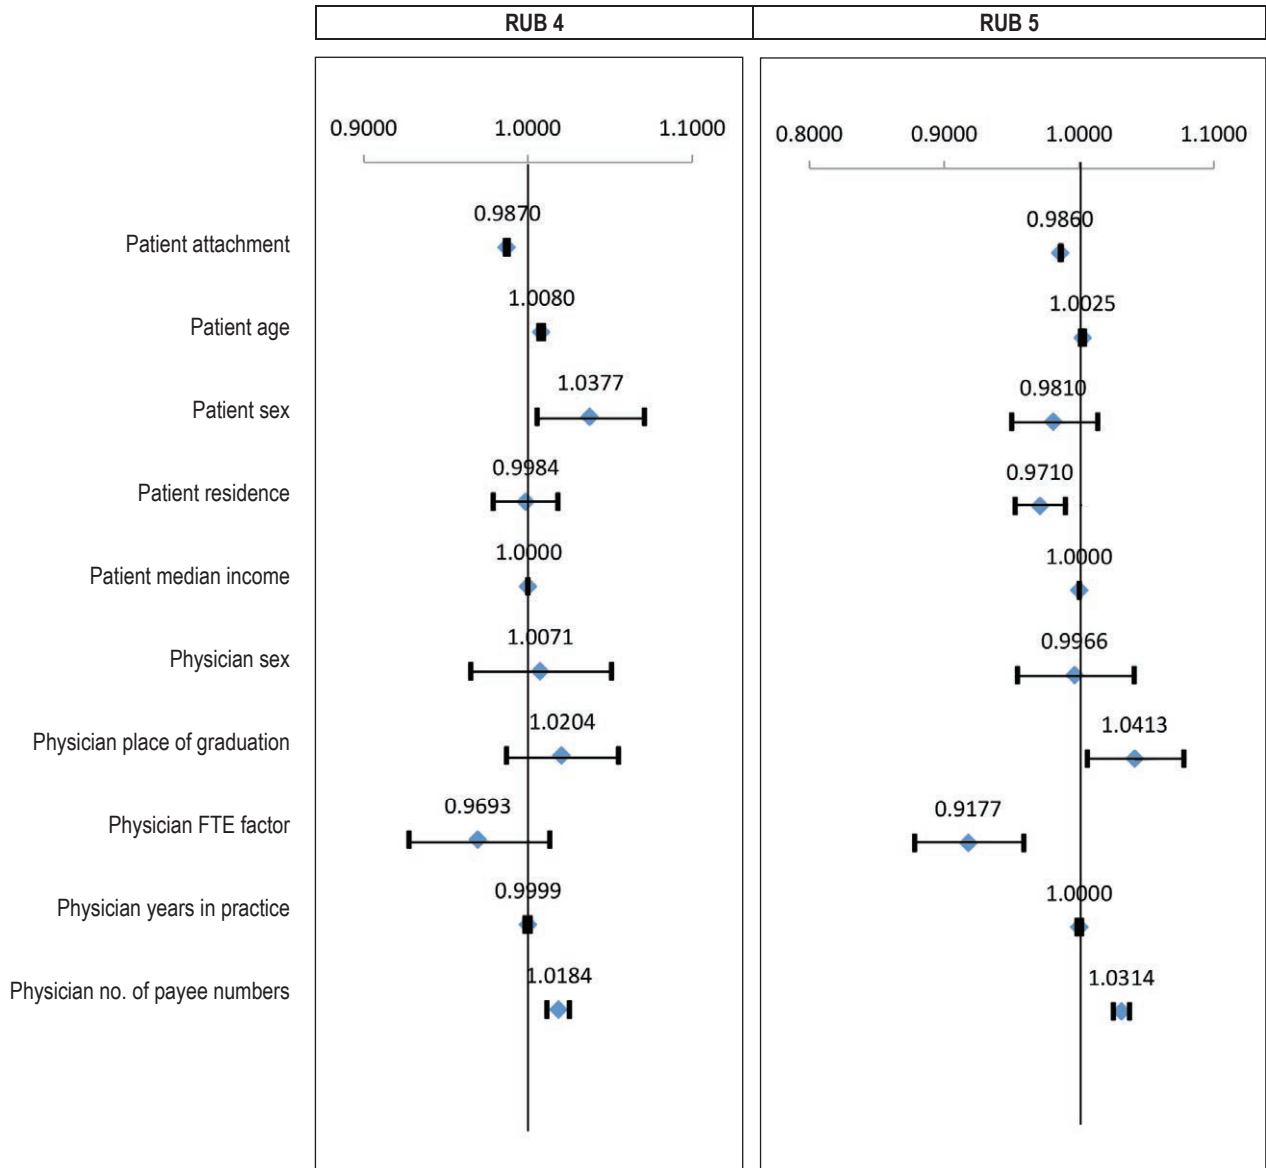

Figure 1A-H. Cost ratio estimates (with 95% confidence intervals) for predictors of total health care costs for 8 chronic conditions in fiscal year 2010-2011.<sup>a</sup>

<sup>a</sup> Cost ratios (Exp[B]) were estimated using generalized linear models with the log link function and  $\gamma$ -distributed errors and all predictors entered simultaneously. Error bars indicate 95% confidence intervals.

COPD = chronic obstructive pulmonary disease; FTE = full-time equivalent; RUB = resource utilization band.

**D. Hypertension**

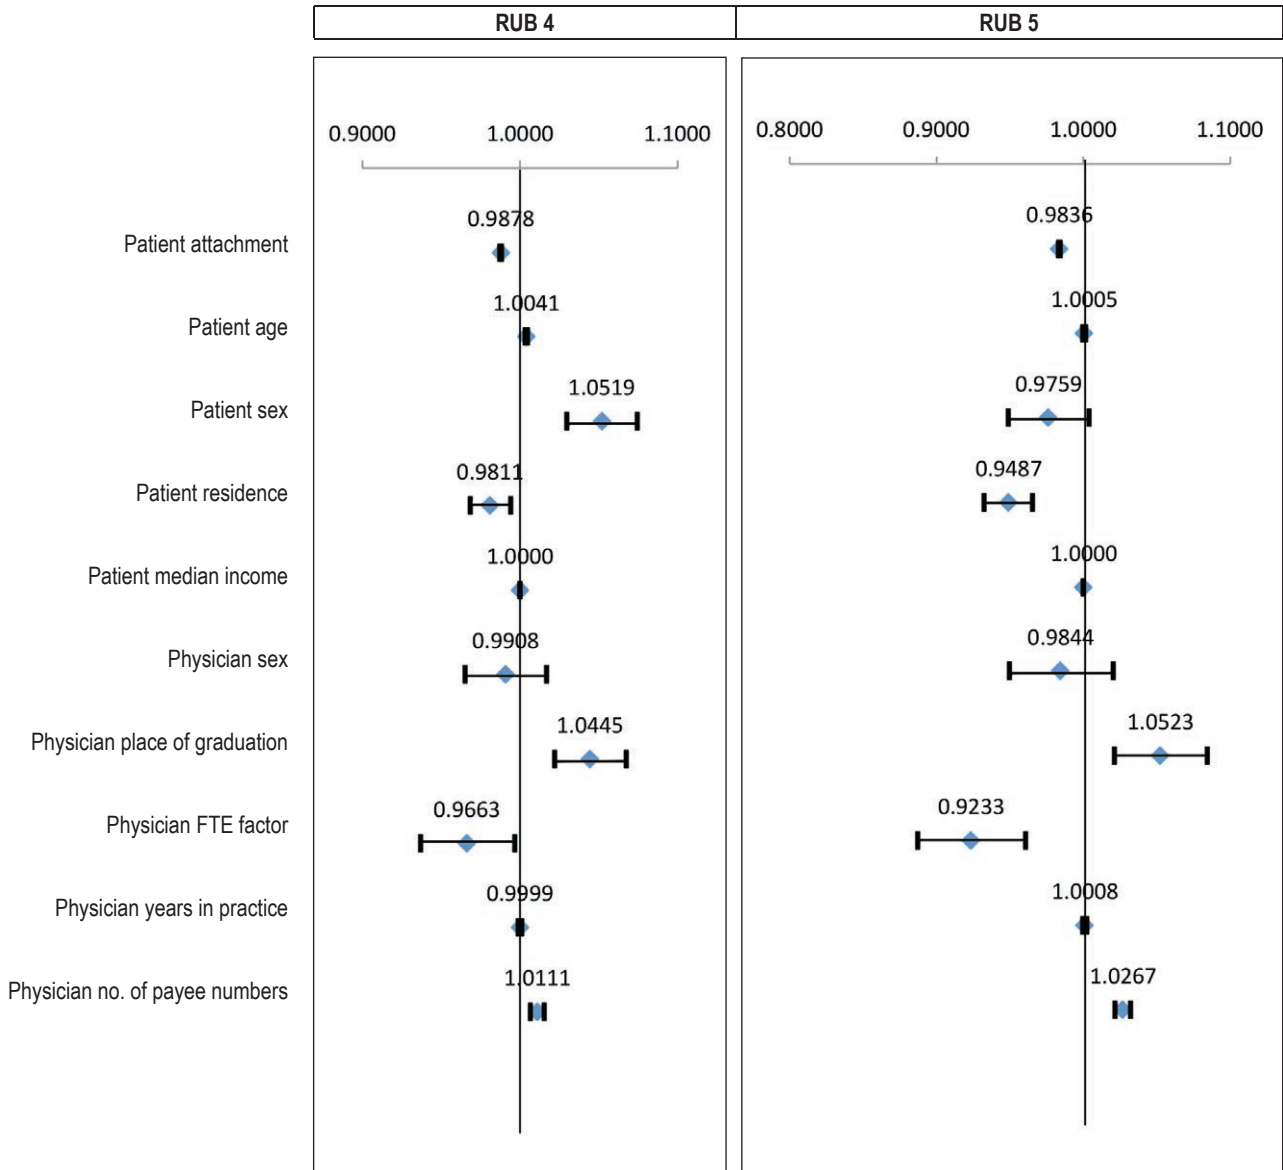

Figure 1A-H. Cost ratio estimates (with 95% confidence intervals) for predictors of total health care costs for 8 chronic conditions in fiscal year 2010-2011.<sup>a</sup>

<sup>a</sup> Cost ratios (Exp[B]) were estimated using generalized linear models with the log link function and  $\gamma$ -distributed errors and all predictors entered simultaneously. Error bars indicate 95% confidence intervals.

FTE = full-time equivalent; RUB = resource utilization band.

E. Angina

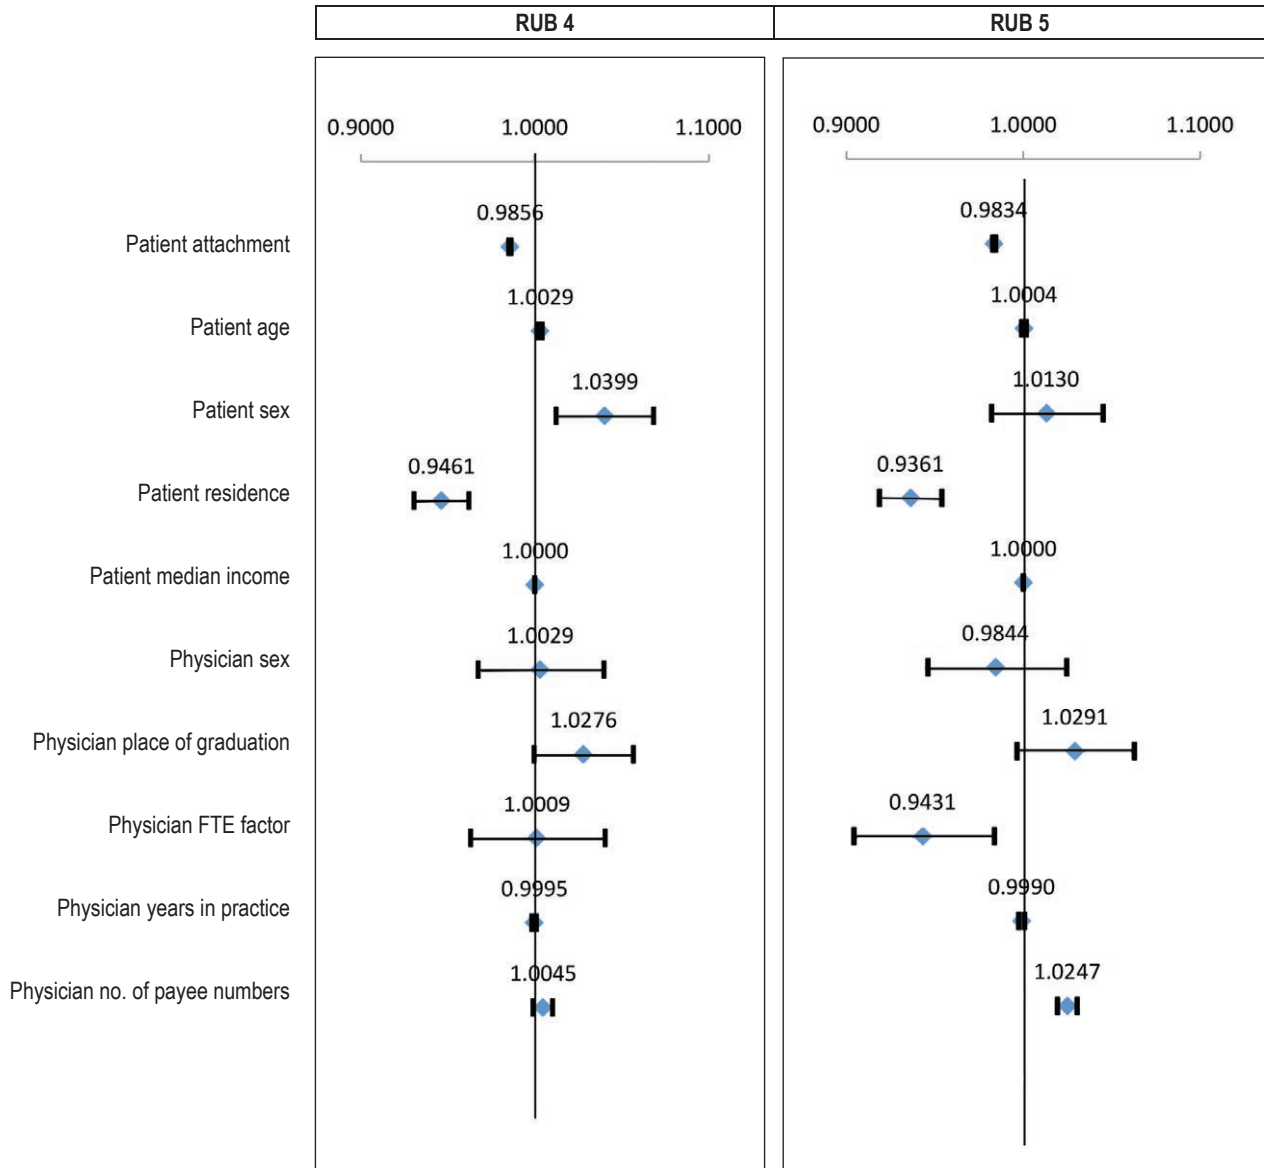

Figure 1A-H. Cost ratio estimates (with 95% confidence intervals) for predictors of total health care costs for 8 chronic conditions in fiscal year 2010-2011.<sup>a</sup>

<sup>a</sup> Cost ratios [Exp(B)] were estimated using generalized linear models with the log link function and  $\gamma$ -distributed errors and all predictors entered simultaneously. Error bars indicate 95% confidence intervals.

FTE = full-time equivalent; RUB = Resource Utilization Band.

F. CKD

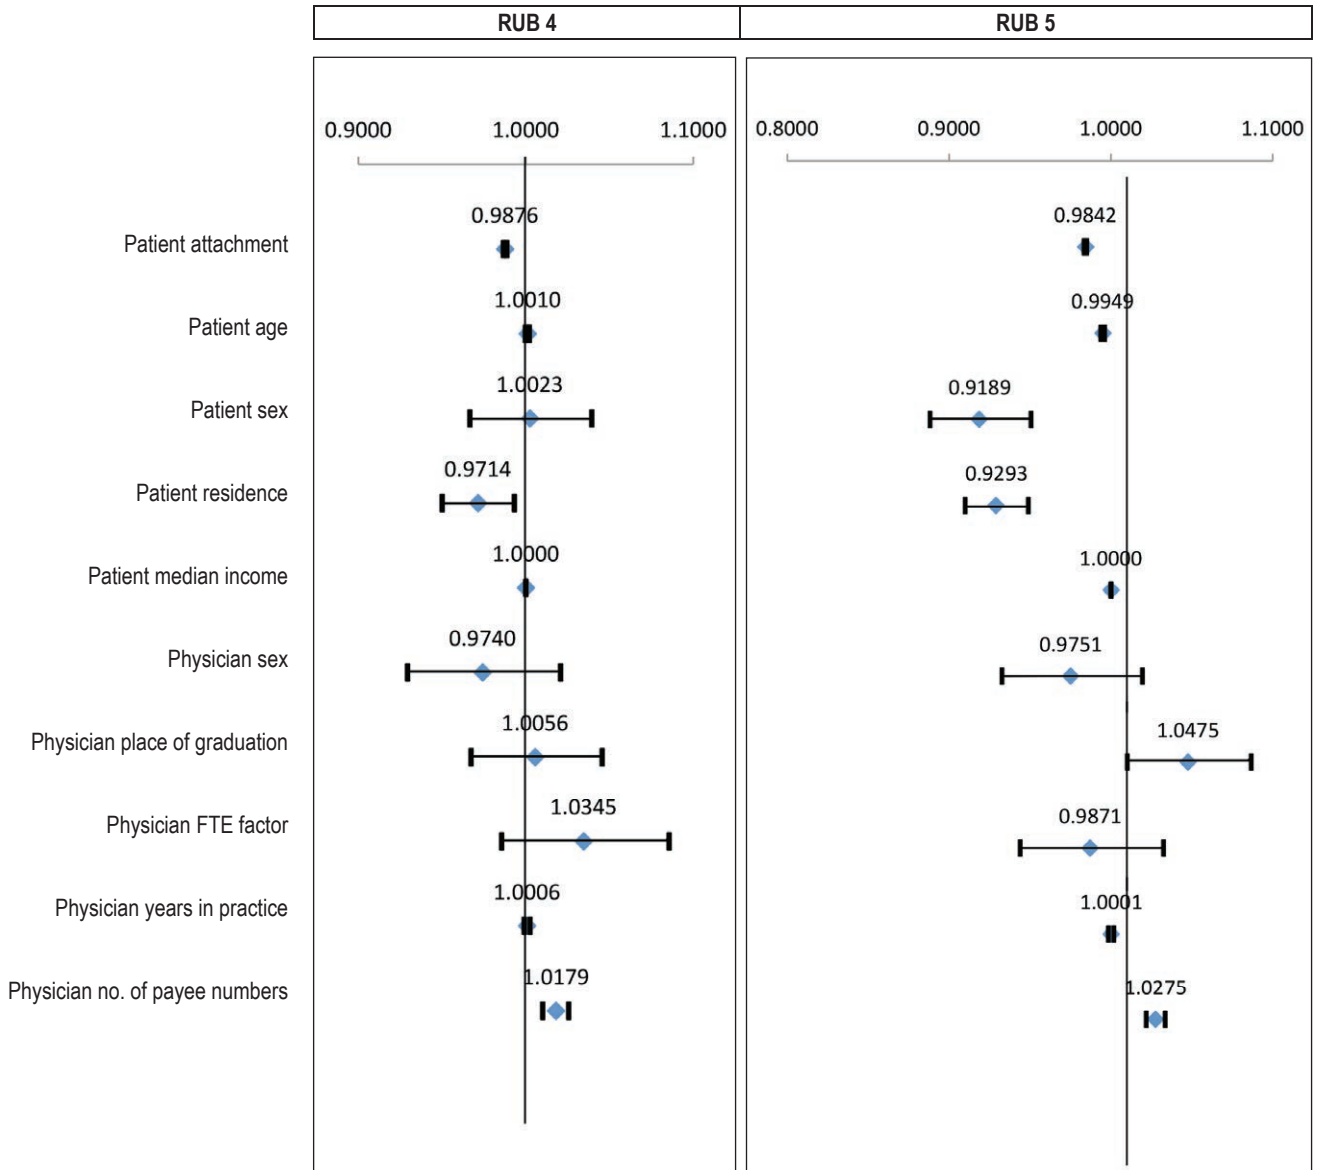

Figure 1A-H. Cost ratio estimates (with 95% confidence intervals) for predictors of total health care costs for 8 chronic conditions in fiscal year 2010-2011.<sup>a</sup>

<sup>a</sup> Cost ratios (Exp[B]) were estimated using generalized linear models with the log link function and  $\gamma$ -distributed errors and all predictors entered simultaneously. Error bars indicate 95% confidence intervals.

CKD = chronic kidney disease; FTE = full-time equivalent; RUB = Resource Utilization Band.

G. Osteoarthritis

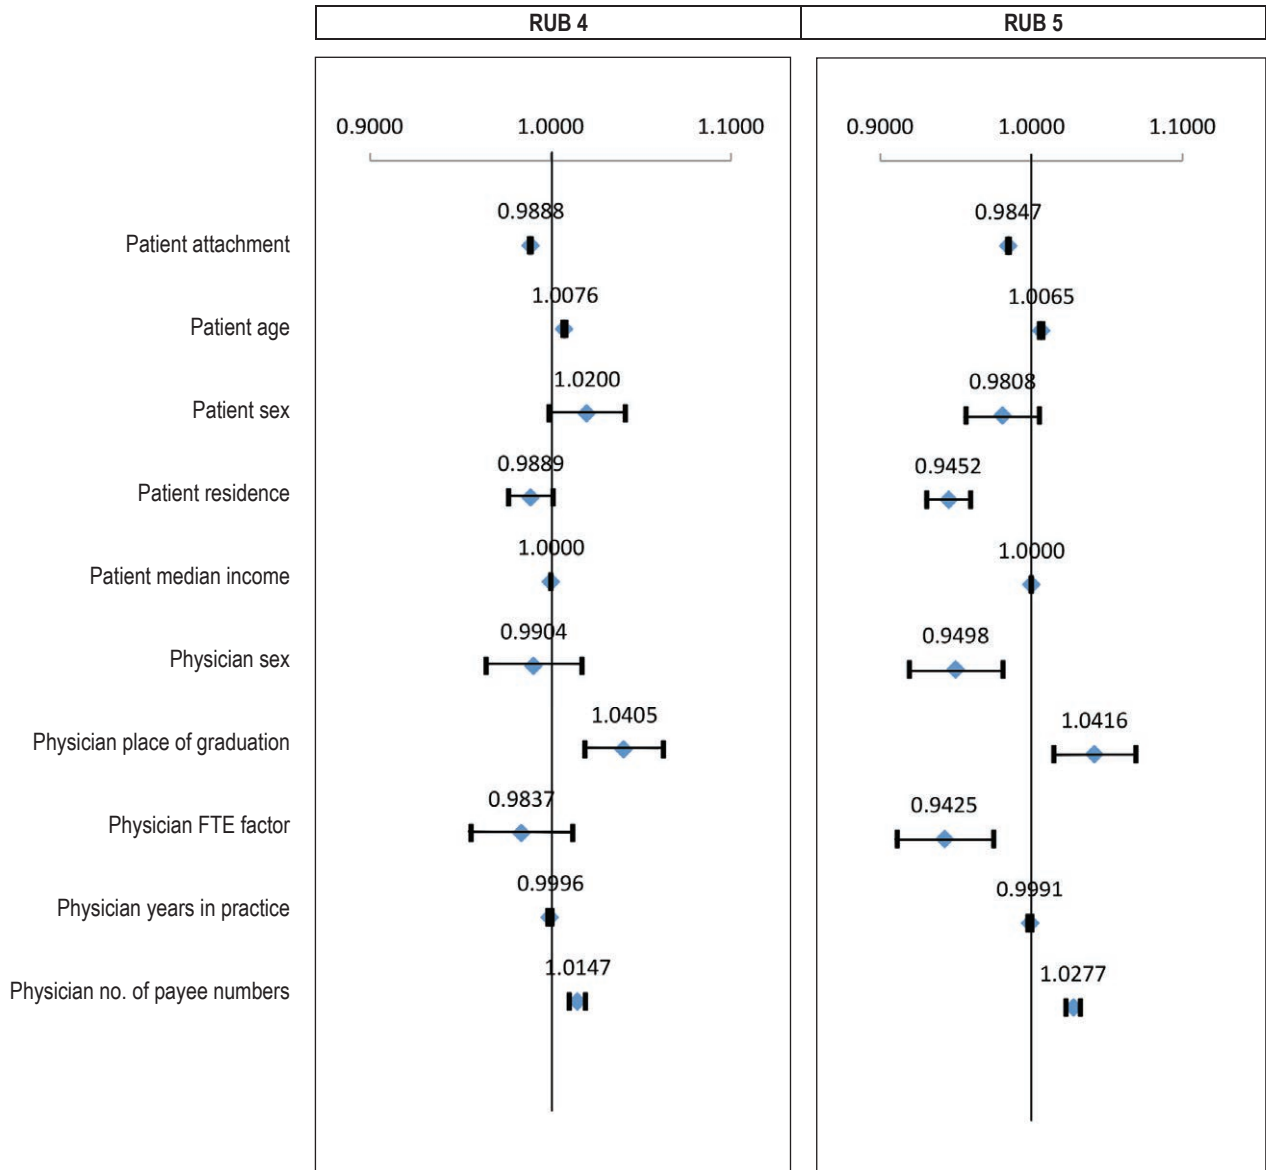

Figure 1A-H. Cost ratio estimates (with 95% confidence intervals) for predictors of total health care costs for 8 chronic conditions in fiscal year 2010-2011.<sup>a</sup>

<sup>a</sup> Cost ratios (Exp[B]) were estimated using generalized linear models with the log link function and  $\gamma$ -distributed errors and all predictors entered simultaneously. Error bars indicate 95% confidence intervals.

FTE = full-time equivalent; RUB = Resource Utilization Band.

H. Stroke

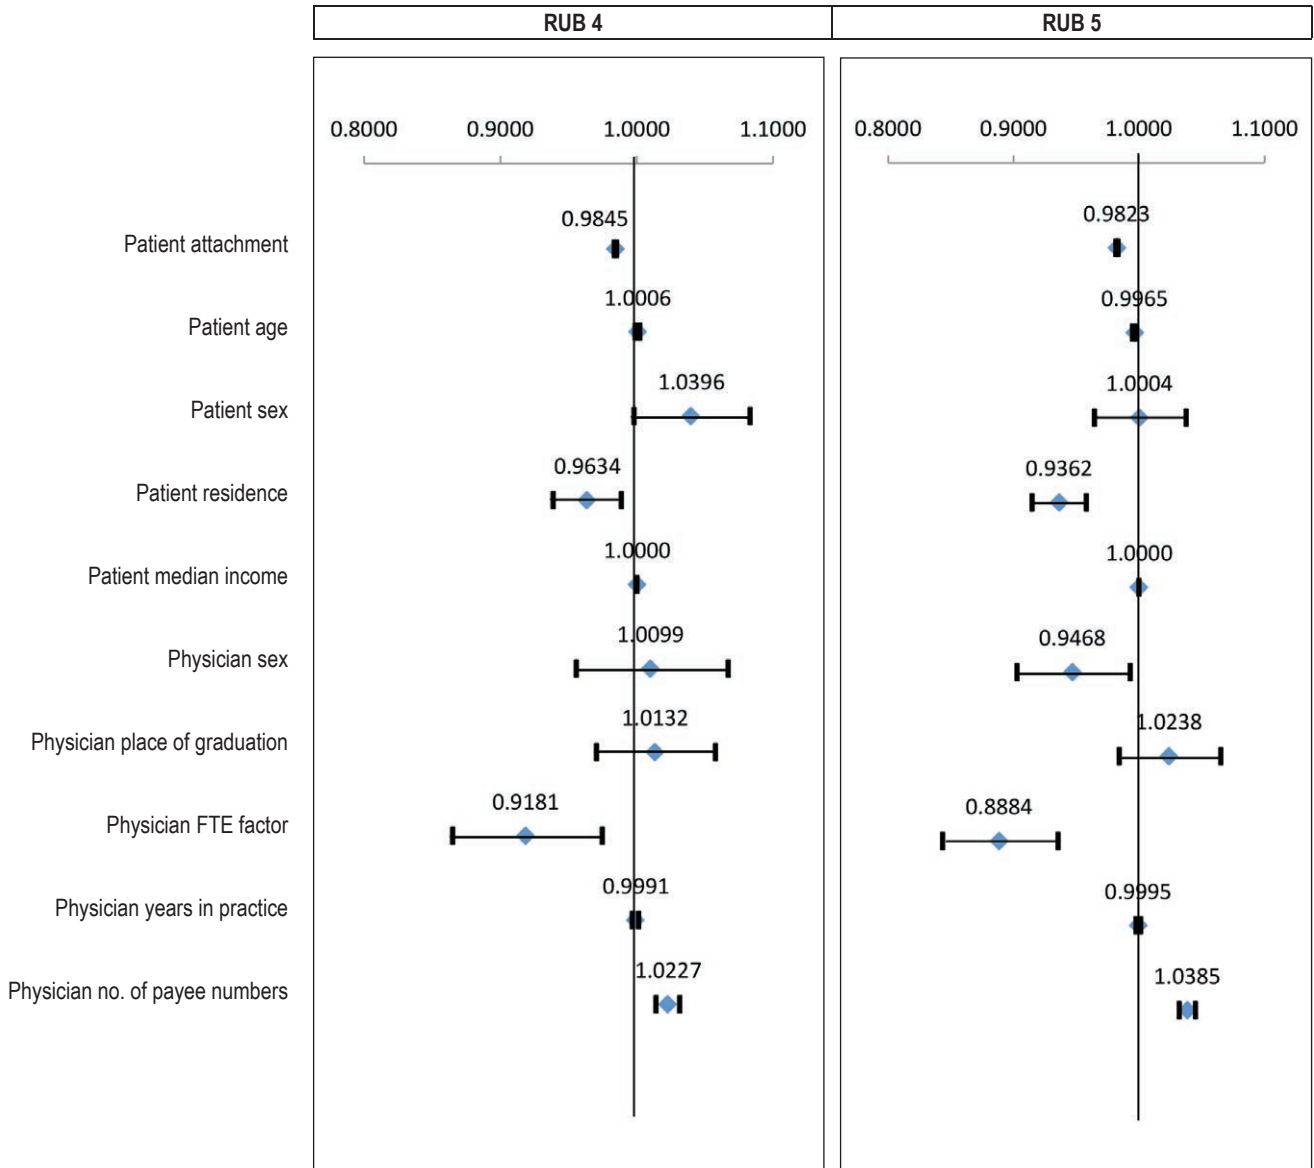

Figure 1A-H. Cost ratio estimates (with 95% confidence intervals) for predictors of total health care costs for 8 chronic conditions in fiscal year 2010-2011.<sup>a</sup>

<sup>a</sup> Cost ratios (Exp[B]) were estimated using generalized linear models with the log link function and  $\gamma$ -distributed errors and all predictors entered simultaneously. Error bars indicate 95% confidence intervals.

FTE = full-time equivalent; RUB = Resource Utilization Band.
